# Supplementary material for: A carbon nanopore model to quantify structure and kinetics of ion electrosorption with in situ small-angle X-ray scattering
Source: Royal Society of Chemistry journal article supplement (doi:10.1039/c7cp00736a), 2017-01-01
Supplement: c7cp00736a1.pdf [file c7cp00736a1.pdf]

1

2                   **A carbon nanopore model to quantify**  
3                   **structure and kinetics of ion electrosorption with**  
4                   **in situ small angle X-ray scattering**

5

6

7                   C. Prehal, C. Koczwara, N. Jäckel,  
8                   H. Amenitsch, V. Presser, O. Paris

9

10

11

12

13

14                   **Electronic Supplementary Information**

15

# 1 Sorption Isotherms

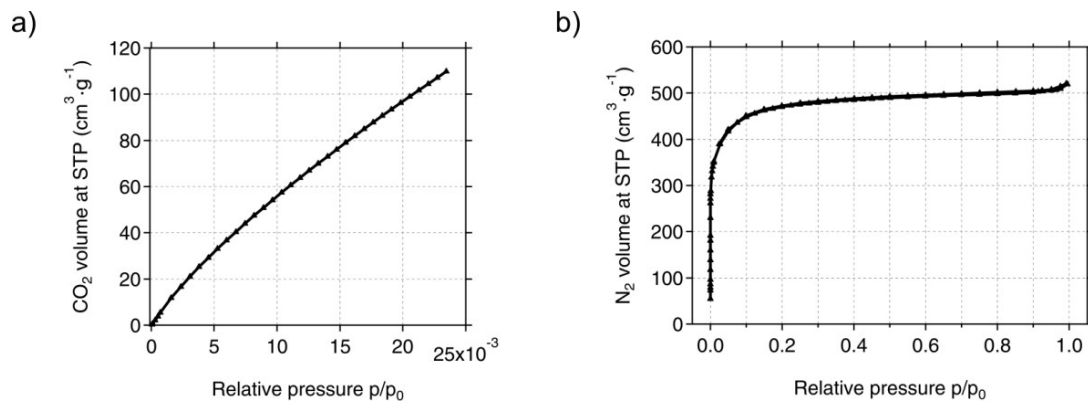

2

3 **Supplementary Figure 1:** Carbon dioxide isotherms (a) and nitrogen isotherms(b) carried out at 273 K  
4 and 77 K, respectively,.

# 5 Raman scattering

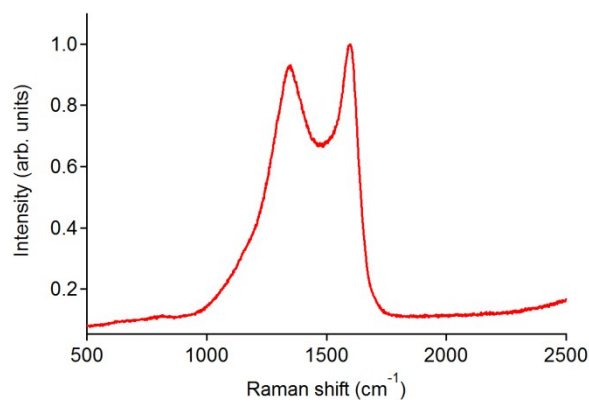

6

7 **Supplementary Figure 2:** Raman spectrum recorded at 532 nm.

# 8 X-ray diffraction

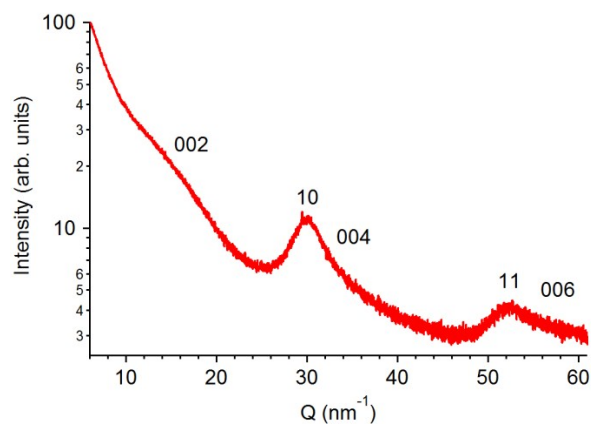

9

10 **Supplementary Figure 3:** X-ray diffraction profile (scattering intensity vs. scattering vector length Q).
